# Supplementary material for: Interest Group Issue Appeals: Evidence of Issue Convergence in Senate and Presidential Elections, 2008–2014
Source: publisher site journal article supplement (doi:10.1515/for-2014-5031), 2014-12-01
Supplement: Supplementary file 1 [file for-2014-5031_Supplement_appendix.doc]

**Supplemental Appendix**

**Issue Codes for 2008 to 2014 (Broad Issue Categories in Italics)**

*Economic Policy*

Taxes

Deficit/Budget/Debt

Government Spending

Recession/Economic Stimulus

Minimum Wage

Farming (friend of)

Business (friend of)

Union (friend of)

Employment/Jobs

Poverty

Trade/Globalization

Housing/Sub-prime Mortgages

Economy (general)

Economic disparity/income inequality (2012 and 2014 only)

*Social Issues*

Abortion

Homosexuality/Gay & Lesbian Rights

Moral/Family/Religious Values

Tobacco

Affirmative Action

Gambling

Assisted Suicide/Euthanasia

Gun Control

Civil Liberties/Privacy

Race Relations/Civil Rights

*Law and Order*

Crime

Narcotics/Illegal Drugs

Capital Punishment

Supreme Court/Judiciary

*Social Welfare Issues*

Education/Schools

Lottery for Education

Child Care

Health Care (not prescription drugs)

Prescription Drugs

Medicare

Social Security

Welfare

Women’s Health

ACA/Obamacare/Health Care law (2014 only)

*Foreign/Defense Policy*

Defense Military (not Iraq)

Foreign Policy (not Iraq)

Veterans

Foreign Aid

Nuclear Proliferation

China

Middle East

Iran

Afghanistan/War in Afghanistan

September, 11th (2010-2014 only)

Terror/Terrorism/Terrorist (2010-2014 only)

Iraq/War in Iraq (2010-2014 only)

Israel (2010-2014 only)

*Other Issues*

Immigration (2012 and 2014 only)

Environment Specific (not Global Warming)

Environment General (not Global Warming)

Global Warming

Energy Policy

BP Oil Spill (2010-2014 only)

Campaign Finance Reform

Government Ethics/Scandal

Government Regulations (2012 ad 2014 only)

Government Shutdown (2014 only)

Corporate Fraud

Term Limits

Pledge of Allegiance (restrictions on use of)

Hurricane Katrina (2008 only)

Local Issues

Other

None

**Figure A.1**
